# Supplementary material
Source: Springer Nature journal article supplement (http://www.springermedizin.de/resource/supplementary/13023_2012_540_MOESM5_ESM.pdf/9642698)

### a Neuromuscular Symptom Score NSS -Average Course-

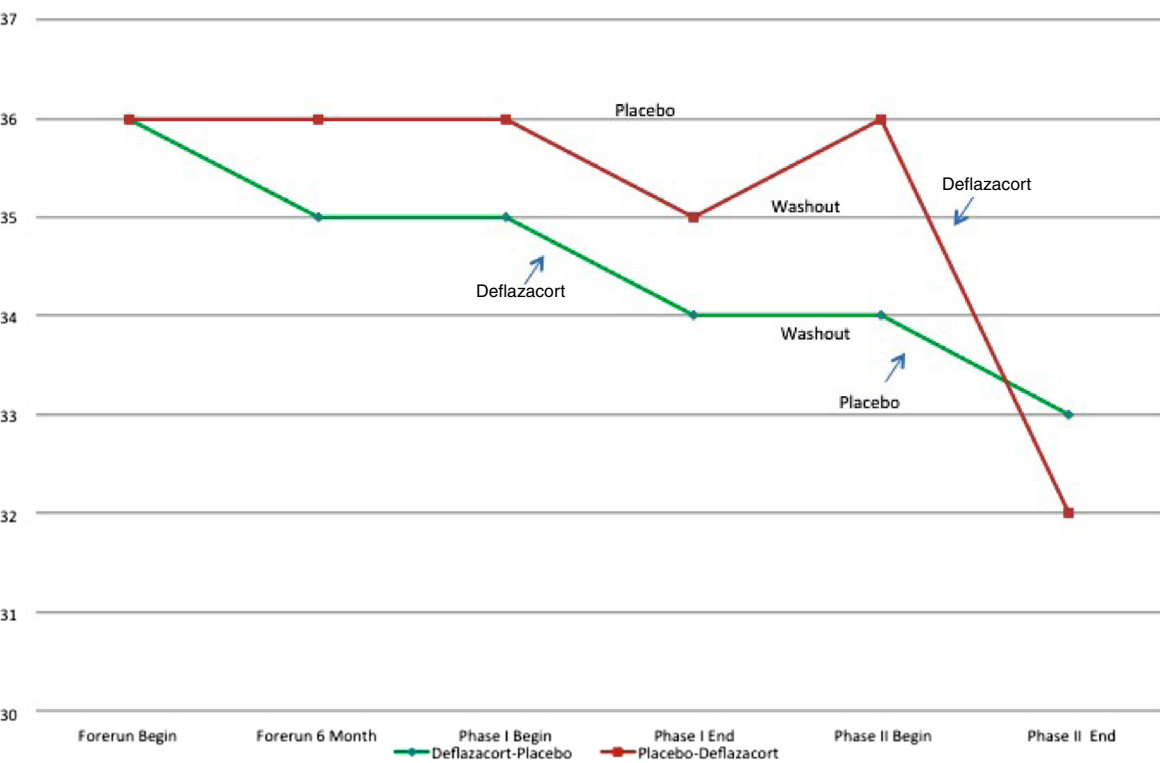

b

### b Neuromuscular Symptom Score NSS -Average Course-

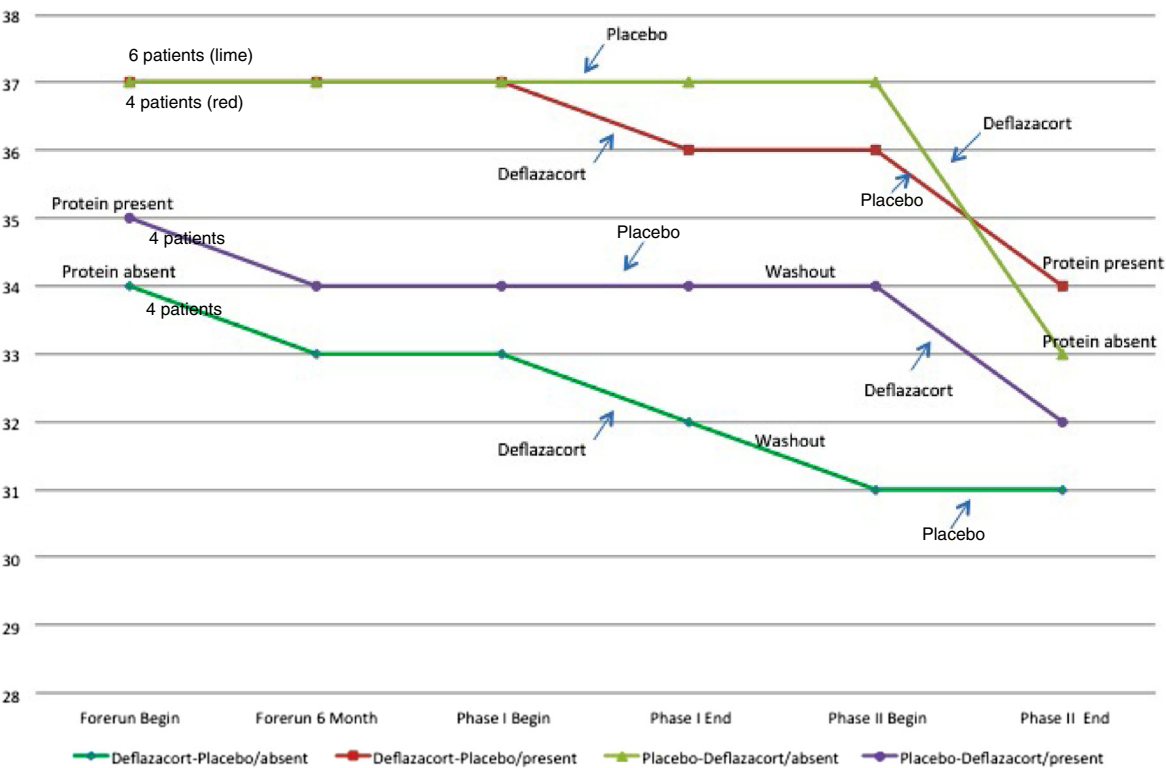

Supplement: MOESM5 [file 9642698]
